# Supplementary material for: Comprehensive Assessment of Polysaccharides Extracted from Squash by Subcritical Water under Different Conditions
Source: MDPI journal article supplement (doi:10.3390/foods13081211), 2024-04-16
Supplement: s1 [file s1]

## Supplementary data:

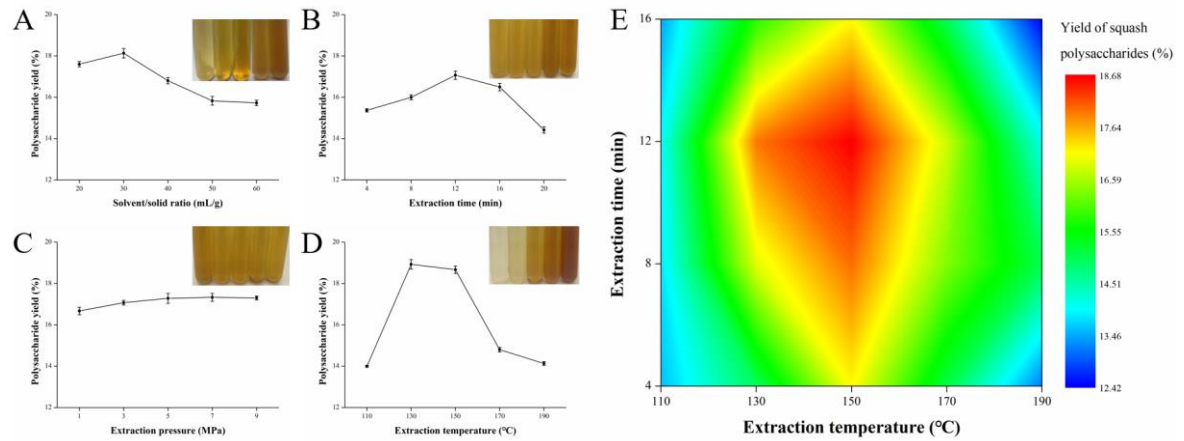

**Supplementary Figure S1** Influence of different extraction factors on polysaccharide yield (A) solvent/solid ratio; (B) extraction time; (C) extraction pressure; and (D) extraction temperature. (E) Effects of different extraction temperature and extraction time on SWESP yield (fixed extraction pressure and solvent/solid ratio).
